# Supplementary material
Source: publisher site journal article supplement (https://www.dovepress.com/article/432398)
Supplement: Supplementary file 1 [file get_supplementary_file.php]

**Supplementary Material 1: Data collection tool for Violence among PWDs section**

**Structured questionnaire used for data collection**

**Name of sub-city_________________Name of Kebelle_____________Household ID____**

| **Section 1: Socio-demographic of participants** | | | |
| --- | --- | --- | --- |
| 101 | How old are you? | age in completed years |  |
| 102 | Sex | 1. Male |  |
| 1. Female |  |
| 103 | What is the highest level of formal education you have completed? | 1. No formal education 2. Primary education (1-8) 3. Secondary education (9-12) 4. Tertiary and above (12+) |  |
| 104 | What is your main occupation? | 1. Not employed (Have no job) 2. Government employee 3. Non-governmental employee 4. private employee 5. self-employee 6. Other (specify) |  |
| 105 | How often did you watch/listen or use (TV/Radio/internet)? | | 1. Almost every day | | --- | | 1. At least once a week | | | 1. Less than once a week 2. No exposure to (TV/Radio/internet) | | |  |
| 106 | With whom you have been living with? | | 1. With family | | --- | | 1. Alone | | | 1. With husband/spouse/partner 2. With friends 3. Other (specify) | | |  |

| **Section 2.**  **Behavioral and disability-related characteristics of participants** | | | |
| --- | --- | --- | --- |
| 107 | For how long you have been living with disability? | ______________ |  |
| 108 | What type of disability do you have? | 1. Visual disability 2. Hearing disability 3. Physical disability |  |
| 109. | Have you engaged with the organization which supports people with disability? | 1. Yes 2. No |  |
| 110. | Have you participated in any community group? | 1. Yes 2. No |  |
| 111 | Have you had control on your personal affairs? | 1. Yes 2. No |  |

**Section 3: Perceived social support, health care access and discrimination by health-care providers**

| **Perceived tangible social support** | | | |  |  |
| --- | --- | --- | --- | --- | --- |
| 112 | | If you experience violence, there is someone who  takes you to the legal bodies | | 1. Strongly disagree 2. Disagree 3. Neutral 4. Agree 5. Strongly agree |  |
| 113 | | If you are sick, there is someone who takes you to  the Doctor | | 1. Strongly disagree 2. Disagree 3. Neutral 4. Agree 5. Strongly agree |  |
| 114 | | If you are confined to bed, there is a special person  who can provide care for you on an ongoing basis | | 1. Strongly disagree  2. Disagree  3. Neutral  4. Agree  5. Strongly agree |  |
| **Emotional/informational support** | | | | | |
| 115 | | There is a special person with whom I can share my  Joys and sorrows. | | 1. Strongly disagree 2. Disagree 3. Neutral 4. Agree 5. Strongly agree |  |
| 116 | | I have a special person who is a real source of  comfort for me | | 1. Strongly disagree 2. Disagree 3. Neutral 4. Agree 5. Strongly agree |  |
| 11117 | | I get the emotional help and support I need from  my family | | 1. Strongly disagree 2. Disagree 3. Neutral 4. Agree 5. Strongly agree |  |
| 118 | | I can count on my friends when things go wrong | | 1. Strongly disagree 2. Disagree 3. Neutral 4. Agree 5. Strongly agree |  |
| 119 | | I can talk about my problems with my family | | 1. Strongly disagree 2. Disagree 3. Neutral 4. Agree 5. Strongly agree |  |
| 120 | There is a special person in my life who cares  about my feelings | | | 1. Strongly disagree 2. Disagree 3. Neutral 4. Agree 5. Strongly agree |  |
| 121 | My family is willing to help me make decisions | | | 1. Strongly disagree 2. Disagree 3. Neutral 4. Agree 5. Strongly agree |  |
| 122 | I can talk about my problems with my friends | | | 1. Strongly disagree 2. Disagree 3. Neutral 4. Agree 5. Strongly agree |  |
| **Affectionate support /positive social interaction** | | | | | |
| **123** | There is someone who shows you love and affection | | | 1. Strongly disagree 2. Disagree 3. Neutral 4. Agree 5. Strongly agree |  |
| 124 | There is someone who makes you feel wanted | | | 1. Strongly disagree 2. Disagree 3. Neutral 4. Agree 5. Strongly agree |  |
| 125 | There is someone to get together with for relaxation | | | 1. Strongly disagree 2. Disagree 3. Neutral 4. Agree 5. Strongly agree |  |
| 126 | There is someone to do something enjoyable with | | | 1. Strongly disagree 2. Disagree 3. Neutral 4. Agree 5. Strongly agree |  |
| 127 | There is someone to do things to help you get your  mind off | | | 1. Strongly disagree 2. Disagree 3. Neutral 4. Agree 5. Strongly agree |  |
| **Experience discrimination by health care providers** | | | | | |
| **128** | | | Health care providers show sympathy for your  problems | 1. Strongly disagree 2. Disagree 3. Neutral 4. Agree 5. Strongly agree |  |
| 129 | Health care providers do not undermine PWDs | | | 1. Strongly disagree 2. Disagree 3. Neutral 4. Agree 5. Strongly agree |  |
| 130 | Health care providers provide enough information  that you need | | | 1. Strongly disagree 2. Disagree 3. Neutral 4. Agree 5. Strongly agree |  |
| 131 | It is easy to communicate with health care providers  about a private issue | | | 1. Strongly disagree 2. Disagree 3. Neutral 4. Agree 5. Strongly agree |  |
| **Perceived health care access** | | | | | |
| 132 | It is very easy to get transportation for people with  disabilities | | | 1. Strongly disagree  2. Disagree  3. Neutral  4. Agree  5. Strongly agree |  |
| 133 | There are good road networks to reach health care  facilities For people with disabilities | | | 1. Strongly disagree  2. Disagree  3. Neutral  4. Agree  5. Strongly agree |  |
| 134 | There are wide corridors and and door entrances  comfortable for people with disabilities | | | 1. Strongly disagree  2. Disagree  3. Neutral  4. Agree  5. Strongly agree |  |
| 135 | Ramps and elevators are available in the health  facilities | | | 1. Strongly disagree  2. Disagree  3. Neutral  4. Agree  5. Strongly agree |  |
| 136 | There are comfortable toilets in the health care  facilities | | | 1. Strongly disagree  2. Disagree  3. Neutral  4. Agree  5. Strongly agree |  |
| 11137 | There are comfortable patient admission beds in the  health facilities | | | 1. Strongly disagree  2. Disagree  3. Neutral  4. Agree  5. Strongly agree |  |
| 13  138 | There are comfortable stretchers and chairs in the  health care facilities | | | 1. Strongly disagree  2. Disagree  3. Neutral  4. Agree  5. Strongly agree |  |
| 139 | There are assistive devices in the health care facilities | | | 1. Strongly disagree  2. Disagree  3. Neutral  4. Agree  5. Strongly agree |  |
| 140 | It is easy to with health care providers | | | 1. Strongly disagree  2. Disagree  3. Neutral  4. Agree  5. Strongly agree |  |
| **Level of reliance on others** | | | | | |
| 141 | Are you economically dependent on others | | | 1. Yes 2. No |  |
| 142 | Do you need the assistance of others to walk from one area to another | | | 1. Yes 2. no |  |
| 143 | Aren’t you confident on yourself to make crucial decisions without the help of other | | | 1. Yes 2. no |  |
| 144 | Do you need the assistance of others to wear your cloths | | | 1. Yes 2. No |  |
| 145 | Do you need the assistance of others to eat your food | | | 1. Yes 2. No |  |
| 146 | Do you need the assistance of others to use a toilet | | | 1. Yes 2. No |  |
| 147 | Do you need the assistance of others to clean your self | | | 1. Yes 2. No |  |
| 148 | Do you need the assistance of others to make any work/ relationship related conversation | | | 1. Yes 2. No |  |

**Section 4: House-hold assets**

| 149 | Does your household have? (circle if the item is available) | 1. Television 2. Radio 3. Electricity 4. Telephone 5. Refrigerator 6. Internet 7. Personal computer (laptop, desktop) |  |
| --- | --- | --- | --- |
| 150 | Does any of your household number own? | 1. Bajaj 2. Animal drown cart 3. Car 4. Motor bike |  |
| 151 | Who owns your household in which your household is living? | 1. Own 2. Rental 3. Other specify………. |  |
| 152 | Do you have separate rooms for sleeping? | 1. Yes 2. No |  |
| 153 | What is the main material of the wall in this dwelling? | | 1. Natural (earth/sand) | | | |  |  |  |  | | --- | --- | --- | --- | --- | --- | --- | --- | | 1. Rudimentary (wood/bamboo) | | | | | | | | | 1. Finished wall |  |  |  |  |  |  |  | | 1. Other (specify) | | | | | | | | |  |
| 154 | What is the main material of the roof in this dwelling? | | 1. Thatch (leaf) 2. Finished (concrete) 3. Corrugated iron 4. Other (specify) _______________ | |  |  |  |  |  | | --- | --- | --- | --- | --- | --- | --- | |  |  | | | | | | |  |
| 155 | What is the main material of the floor in this dwelling? | | 1. Natural (earth/sand) |  |  |  |  | | --- | --- | --- | --- | --- | | 1. Dung 2. Finished floor (cement, tile, brink) 3. Other (specify) | | | | | | |  |
| 157 | What is the main source of drinking water? | | 1. piped water | | | | | | --- | --- | --- | --- | --- | | 1. open well 2. covered well / borehole | | | | | | 1. spring 2. Surface water (river, stream) 3. Rain water 4. Other (specify) |  |  |  |  | |  |  |  |  |  | |  |
| 158 | What kind of toilet facility does members of your household use? | 1. No latrine/bush/ field 2. Traditional pit toilet 3. Ventilated pit latrine 4. Flush toilet 5. Other (specify) |  |
| 159 | Do you have a bed? | 1. Yes 2. No |  |
| 160 | Which source of energy you used for cooking? | 1. Electricity/stove 2. Wood/grass 3. Charcoal |  |
| 161 | Where do you prepare food? | 1. No building /outside 2. No separate building/at home 3. Have separate building/kitchen |  |

**Section 5: The experience of sexual, emotional and physical violence**

| **Sexual violence** | | | |
| --- | --- | --- | --- |
| 153 | Have you ever physically forced to have sexual intercourse against your will in the last 12 months? | 1. Yes 2. No |  |
| 154 | Have you ever had sex while you did not want it because you were afraid of what the person might do in the last 12 months? | 1. Yes 2. No |  |
| 155 | Have you ever forced to do something sexual that you found humiliating or degrading In the last 12 months? | 1. Yes 2. No |  |
| **Emotional violence** | | | |
| 156 | Have you ever insulted that makes you feel bad about yourself in the last year? | 1. yes |  |
| 157 | Have you ever belittled or humiliated them in front of others in the last year? |
| 158 | Have you ever experienced being scared or intimidated purposely by someone in the last year? | 1. Yes 2. No |  |
| 159 | Have you ever being threatened to hurt you by someone in the last year? | 1. Yes 2. No |  |
| **Physical violence** | | | |
| 160 | Have you ever being slapped or thrown things at you by someone in the last year? | 1. Yes 2. No |  |
| 161 | Have you ever being pushed/shoved in the last year? | 1. Yes 2. No |  |
| 162 | Have you ever been beaten up with a fist/thrown something that could hurt you in the last year? | 1. Yes 2. No |  |
| 163 | Have you ever being choked/burnt on purpose in the last year? | 1. Yes 2. No |  |
| 164 | Have you ever threatened by someone with/ used a gun in the last year? | 1. Yes 2. No |  |
| 165 | Have you ever kicked/beaten up in the last year? | 1. Yes 2. No |  |
